# Supplementary material
Source: publisher figshare collection journal article supplement (https://acs.figshare.com/ndownloader/files/4757197)
Supplement: Supplementary file 1 [file 4757197]

## Supporting Information

A)

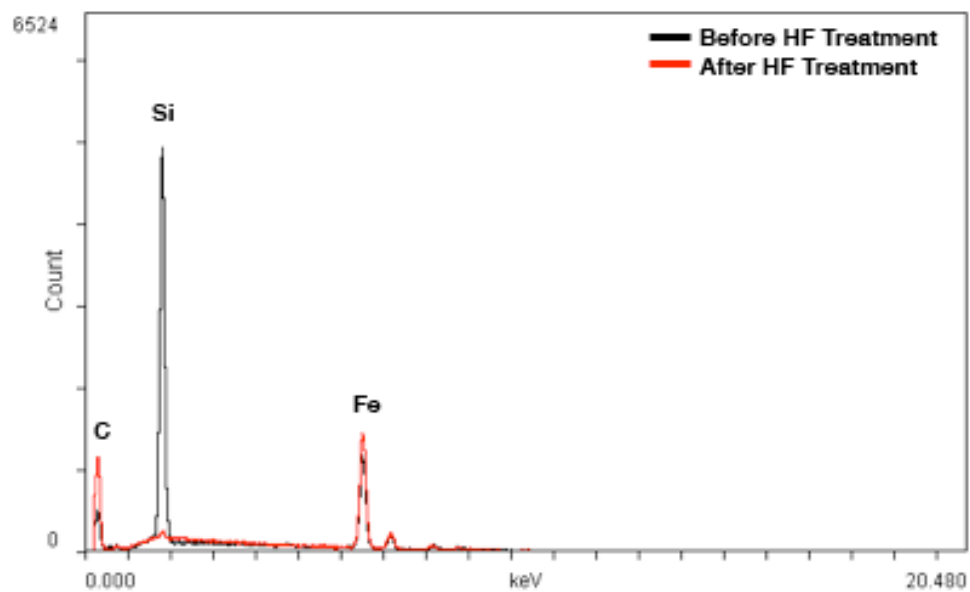

B)

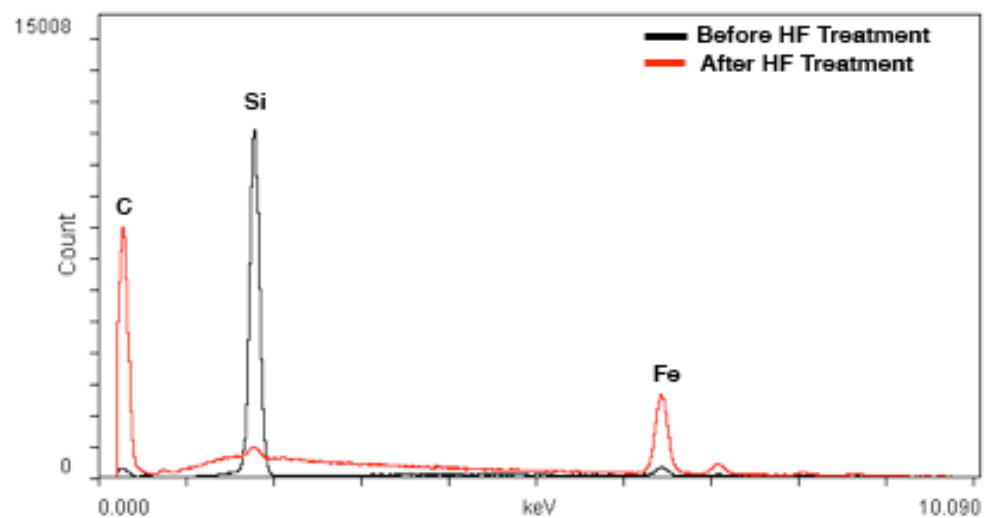

Supplementary Figure 1: A) EDS data for MWNT-silica membrane before and after HF treatment. B) EDS data for the multilayered MWNT-silica structure before and after HF treatment.
